# Supplementary material
Source: publisher figshare collection journal article supplement (https://future-science-group.figshare.com/ndownloader/files/31135969)
Supplement: Supplementary file 1 [file 31135969]

Supplementary Material

**Figure 1. Overall Survival, Relative to Start of 2nd LOT, ASCT-Intended, Stratified by Time-to-Relapse**
